# Supplementary material
Source: HighWire-hosted journal article supplement (https://www.jneurosci.org/content/40/11/2259)
Supplement: inline-supplementary-material-1 [file inline-supplementary-material-1.xlsx]

## Sheet: Table 1-1
Descriptive Statistics for CF Area (%)											means ± SEM
Group		CF Bin (kHz)
	N	1.3	2.5	3.5	5	7	10	14	20	28	48
Naïve-UT	10	15.60 ± 1.38	4.79 ± 1.58	3.82 ± 0.97	4.54 ± 1.49	3.08 ± 0.78	8.19 ± 1.46	7.96 ± 1.54	11.95 ± 2.42	16.63 ± 2.32	23.43 ± 2.10
Naïve-T	8	15.37 ± 2.60	3.90 ± 1.21	4.49 ± 0.97	4.53 ± 1.29	11.62 ± 1.34	4.08 ± 1.07	9.23 ± 1.58	11.62 ± 1.94	8.64 ± 2.18	26.51 ± 1.84
7kHz-UT	6	14.23 ± 1.59	3.33 ± 1.12	3.20 ± 0.43	3.02 ± 1.02	15.84 ± 1.82	7.20 ± 1.32	5.45 ± 1.63	6.11 ± 2.37	15.63 ± 2.42	25.98 ± 1.86
7kHz-T	9	17.86 ± 1.87	5.25 ± 1.60	3.77 ± 0.67	3.38 ± 1.19	8.10 ± 2.27	4.59 ± 1.10	7.77 ± 1.82	8.96 ± 1.84	7.97 ± 1.62	32.35 ± 3.69
7kHz-UT+12wks	4	18.31 ± 2.96	0.93 ± 0.93	2.87 ± 1.75	0.89 ± 0.89	11.63 ± 3.48	5.30 ± 1.77	5.66 ± 1.24	9.63 ± 3.60	15.46 ± 3.44	29.31 ± 2.53
15kHz-UT	5	13.32 ± 1.92	2.36 ± 1.23	6.98 ± 0.46	2.37 ± 1.20	3.39 ± 1.05	1.92 ± 1.32	19.11 ± 0.65	5.86 ± 1.59	13.30 ± 2.97	31.39 ± 3.33
15kHz-T	8	15.42 ± 1.95	2.53 ± 0.63	3.11 ± 0.71	0.69 ± 0.46	10.26 ± 1.74	2.37 ± 0.38	13.72 ± .74	9.22 ± 1.08	15.06 ± 2.17	27.60 ± 1.20
Descriptive Statistics for BF Area (%)
Group		BF Bin (kHz)
	N	1.3	2.5	3.5	5	7	10	14	20	28	48
Naïve-UT	10	25.97 ± 3.30	4.40 ± 1.09	3.94 ± 1.16	5.54 ± 1.67	6.90 ± 1.29	5.97 ± 1.55	7.10 ± 2.12	14.07 ± 4.57	9.72 ± 1.92	16.40 ± 1.94
Naïve-T	8	25.68 ± 2.60	5.63 ± 1.02	2.55 ± 1.00	8.43 ± 1.55	8.15 ± 1.96	8.57 ± 2.00	7.05 ± 3.34	10.25 ± 2.04	6.59 ± 1.89	17.11 ± 3.00
7kHz-UT	6	24.09 ± 3.46	4.01 ± 1.13	5.15 ± 1.89	6.00 ± 1.47	12.85 ± 2.28	6.24 ± 0.82	5.22 ± 1.99	5.73 ± 2.02	7.97 ± 2.33	22.74 ± 4.18
7kHz-T	9	26.90 ± 2.69	4.51 ± 1.63	4.43 ± 1.31	7.75 ± 1.91	9.42 ± 2.27	4.38 ± 1.35	5.34 ± 1.54	7.56 ± 2.85	8.32 ± 1.12	21.39 ± 3.41
7kHz-UT+12wks	4	29.50 ± 6.33	2.62 ± 1.70	2.91 ± 0.98	3.95 ± 2.31	18.18 ± 6.67	10.71 ± 2.52	4.37 ± 1.65	5.34 ± 2.83	8.09 ± 2.43	14.32 ± 2.69
15kHz-UT	5	22.80 ± 2.21	2.71 ± 1.18	8.69 ± 2.27	7.38 ± 2.48	5.87 ± 1.94	5.88 ± 1.92	9.63 ± 2.36	7.42 ± 0.55	5.94 ± 1.81	23.67 ± 2.29
15kHz-T	8	26.82 ± 2.90	3.88 ± 1.46	3.65 ± 8.42	2.98 ± 0.79	5.63 ± 0.82	6.37 ± 2.00	5.69 ± 1.32	8.28 ± 1.32	9.78 ± 1.72	26.92 ± 2.17
Descriptive Statistics for Bandwidth at 60dB (Octaves)
Group		BF Bin (kHz)
	N	1.3	2.5	3.5	5	7	10	14	20	28	48
Naïve-UT	182, 10	1.66 ± 0.12	1.85 ± 0.24	2.27 ± 0.17	2.31 ± 0.16	2.32 ± 0.10	2.01 ± 0.14	1.97 ± 0.17	1.68 ± 0.19	1.62 ± 0.33	1.00 ± 0.21
Naïve-T	160, 8	1.61 ± 0.16	2.29 ± 0.31	2.34 ± 0.60	2.37 ± 0.22	2.40 ± 0.21	2.32 ± 0.19	2.41 ± 0.29	1.93 ± 0.22	1.86 ± 0.36	0.95 ± 0.19
7kHz-UT	148, 6	2.12 ± 0.16	2.48 ± 0.25	2.45 ± 0.22	2.37 ± 0.14	2.68 ± 0.15	2.62 ± 0.19	2.29 ± 0.46	2.42 ± 0.20	2.22 ± 0.31	2.02 ± 0.26
7kHz-T	222, 9	1.58 ± 0.10	1.81 ± 0.32	1.95 ± 0.11	2.11 ± 0.19	2.16 ± 0.09	2.17 ± 0.16	1.47 ± 0.19	1.95 + 0.21	1.41 ± 0.24	1.08 ± 0.18
7kHz-UT+12wks	79, 4	1.56 ± 0.18	2.18 ± 0.08	2.24 ± 0.00	2.16 ± 0.13	2.29 ± 0.23	2.26 ± 0.19	2.53 ± 0.21	2.81 ± 0.19	2.66 ± 0.26	1.46 ± 0.47
Descriptive Statistics for Responsive Area Overlap (%)
Group		Intensity (dB)
	N	0	10	20	30	40	50	60	70
Naïve-UT	10	0.39 ± 0.39	0	0.23 ± 0.23	0.53 ± 0.35	2.58 ± 0.75	5.30 ± 1.38	18.26 ± 3.18	38.87 ± 5.88
Naïve-T	8	1.53 ± 0.81	1.53 ± 0.81	2.21 ± 0.91	3.86 ± 1.60	5.41 ± 2.33	11.32 ± 2.78	22.37 ± 5.03	35.06 ± 5.89
7kHz-UT	6	0.36 ± 0.36	0.36 ± 0.36	3.09 ± 1.14	3.45 ± 0.99	4.59 ± 1.05	13.18 ± 2.67	37.36 ± 6.52	62.12 ± 5.92
7kHz-T	9	0	0	0.74 ± 0.49	0.74 ± 0.49	2.68 ± 0.96	5.49 ± 1.62	19.45 ± 5.37	39.37 ± 6.87
7kHz-UT+12wks	4	0	0	0	0	0.83 ± 0.83	6.97 ± 2.73	34.72 ± 8.96	51.31 ± 5.49
Descriptive Statistics for Non-Responsive Area (%)
Group		Intensity (dB)
	N	0	10	20	30	40	50	60	70
Naïve-UT	10	98.70 ± 0.67	99.08 ± 0.61	98.55 ± 0.80	97.45 ± 1.17	94.46 ± 1.64	87.72 ± 2.32	65.63 ± 4.26	43.12 ± 5.70
Naïve-T	8	96.57 ± 1.22	96.19 ± 1.24	91.85 ± 1.99	91.05 ± 2.50	87.74 ± 2.00	77.63 ± 3.38	64.00 ± 6.11	47.74 ± 6.44
7kHz-UT	6	98.98 ± 0.69	97.61 ± 0.78	95.20 ± 0.94	93.03 ± 0.84	88.60 ± 2.34	71.99 ± 5.49	47.07 ± 6.96	26.25 ± 3.95
7kHz-T	9	99.72 ± 0.29	99.75 ± 0.25	97.30 ± 0.94	95.82 ± 1.12	93.65 ± 1.61	87.34 ± 2.99	69.73 ± 5.19	44.39 ± 4.39
7kHz-UT+12wks	4	98.24 ± 1.02	99.17 ± 0.83	99.17 ± 0.83	96.16 ± 2.26	93.41 ± 3.81	86.57 ± 3.62	43.07 ± 4.17	34.96 ± 5.83
